# Supplementary material
Source: publisher figshare collection journal article supplement (https://acs.figshare.com/ndownloader/files/22046655)
Supplement: Supplementary file 1 [file 22046655]

## Supplementary Information

### Sustainable and Transparent Fish Gelatin Films for Flexible Electroluminescent Devices

*Xiaopan Zhang,<sup>†,§</sup> Tengyang Ye,<sup>†,§</sup> Xianghao Meng,<sup>†</sup> Zhihui Tian,<sup>†</sup> Lihua Pang,<sup>†</sup> Yaojie Han,<sup>†</sup> Hai Li,<sup>†</sup> Gang Lu,<sup>†</sup> Fei Xiu,<sup>†</sup> Hai-Dong Yu,<sup>\*,†</sup> Juqing Liu,<sup>\*,†</sup> Wei Huang<sup>\*,†,‡</sup>*

<sup>†</sup>Institute of Advanced Materials (IAM) & Key Laboratory of Flexible Electronics (KLoFE), Jiangsu National Synergetic Innovation Center for Advanced Materials (SICAM), Nanjing Tech University (Nanjing Tech), 30 South Puzhu Road, Nanjing 211816, PR China.

<sup>‡</sup>Xi'an Institute of Flexible Electronics, MIIT Key Laboratory of Flexible Electronics, Shaanxi Key Laboratory of Flexible Electronics, Xi'an Key Laboratory of Flexible Electronics (KLoFE) & Xi'an Key Laboratory of Biomedical Materials & Engineering, Northwestern Polytechnical University, 127 West Youyi Road, 710072 Xi'an, China.

<sup>§</sup>These authors contributed equally.

Correspondence: H. D. Yu (iamhdyu@njtech.edu.cn), J. Liu (iamjqliu@njtech.edu.cn), or W. Huang (iamwhuang@njtech.edu.cn)

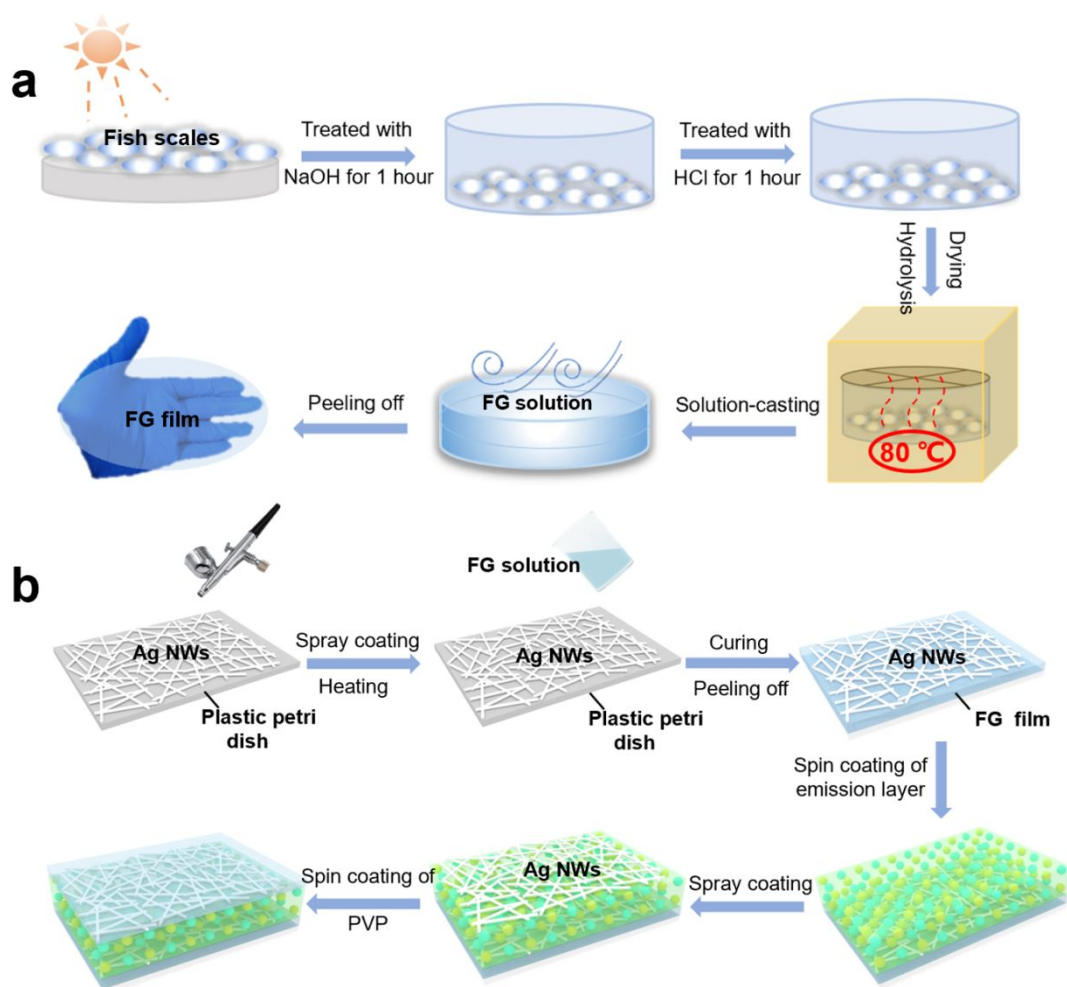

**Figure S1.** Schematic diagrams showing the preparation procedures of (a) the FG film and (b) the ACEL device.

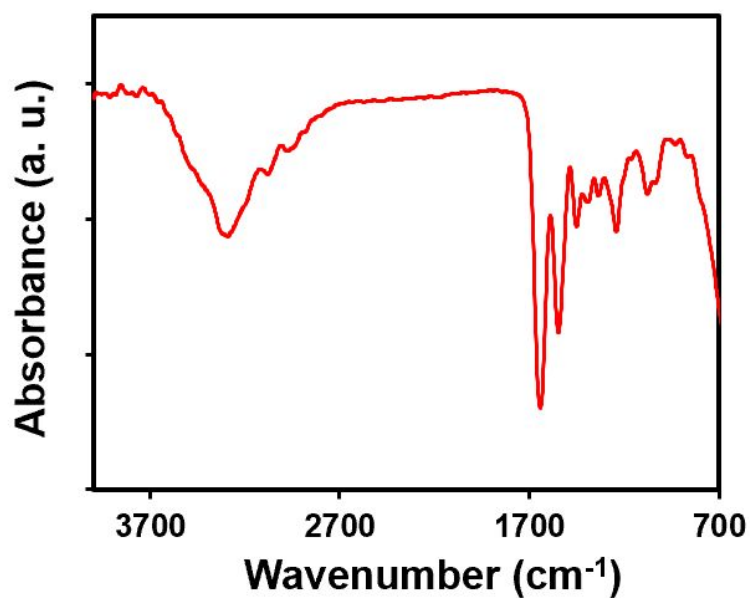

**Figure S2.** FTIR spectrum of the FG film.

A FTIR measurement was carried out to illustrate the functional groups in FG film. As shown in Figure S2 in the Supporting Information, the absorption bands at 1646, 1550 and 1242  $\text{cm}^{-1}$  corresponds to amide-I (C=O stretching), amide-II (N-H bending or C-N stretching) and amide-III (in plane vibrations of C-N and N-H in bound amide or vibrations of  $\text{CH}_2$  groups in glycine) respectively, indicating the presence of amides in gelatin. The broad band beyond 3308  $\text{cm}^{-1}$  corresponds to the hydroxyl and amino groups, and the absorption band at 1330  $\text{cm}^{-1}$  is attributable to  $\text{CH}_2$  wagging in proline. These results are consistent with the previous reports.<sup>1,2</sup>

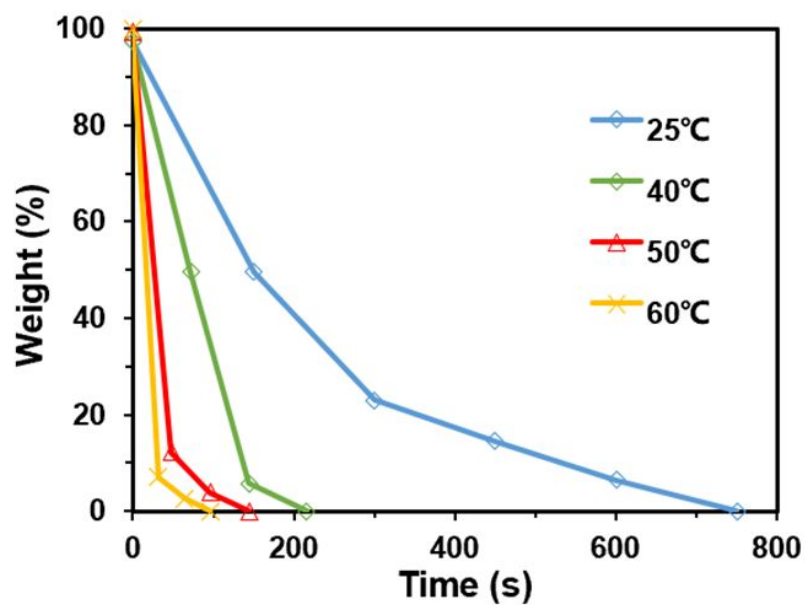

**Figure S3.** Dissolution curves of the FG films in water at 25, 40, 50 and 60 °C.

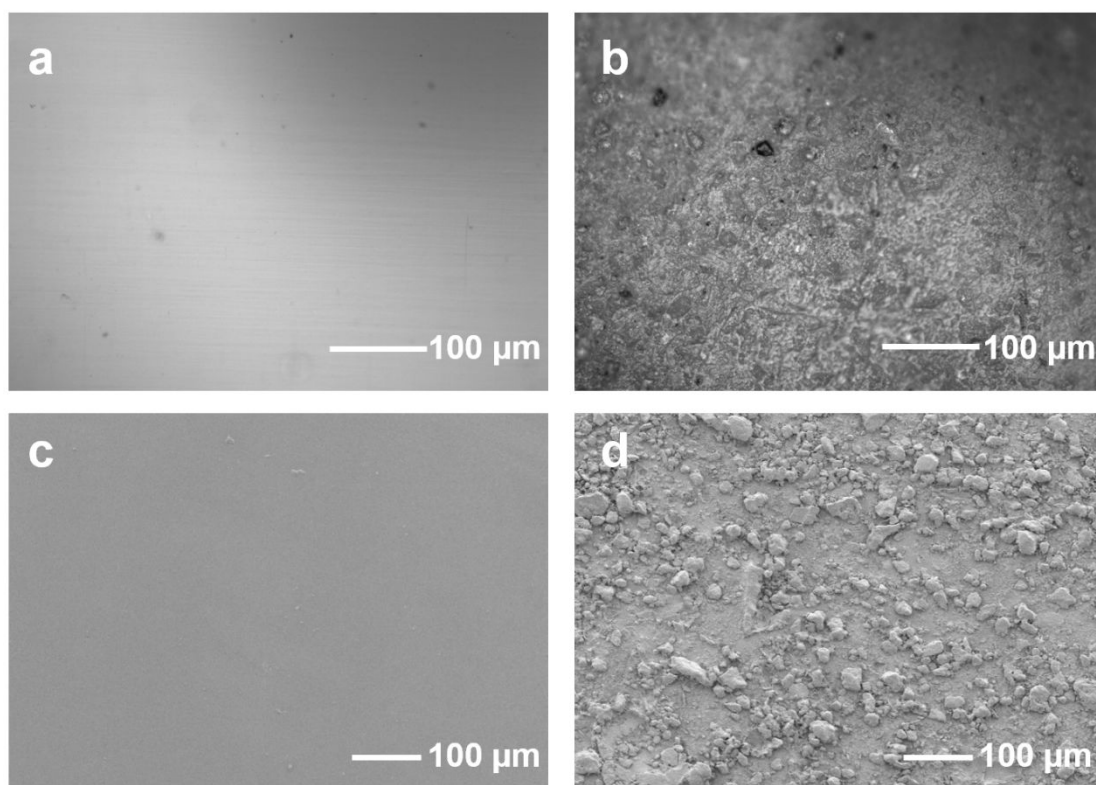

**Figure S4.** Optical images of (a) the as-prepared FG film and (b) the one buried in soil for 24 hours. SEM images of (c) the as-prepared FG film and (d) the one buried in soil for 24 hours.

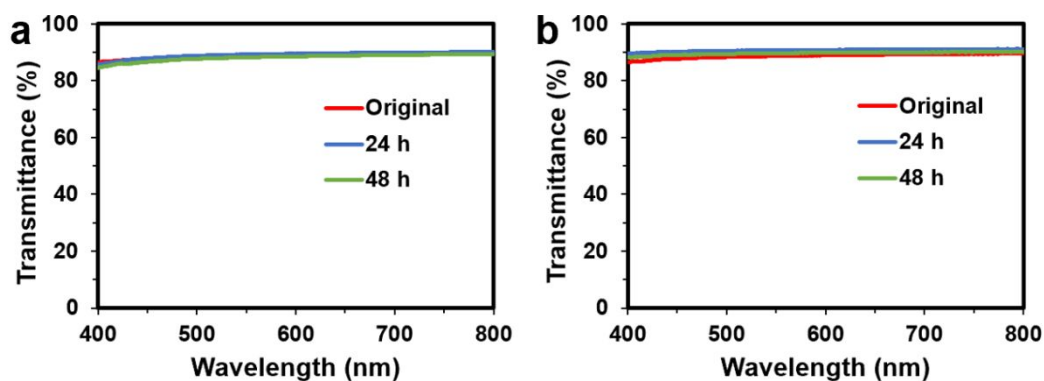

**Figure S5.** Light transmittances of the FG films after being exposed to (a) air at 100% humidity and (b) sunlight for 0, 24 and 48 hours.

As reported by Etxabide *et al.*, the FG film buried in soil for a certain period could be corroded microbially,<sup>2</sup> which leads to a roughening of the film surface and makes the film opaque. They carried out FTIR measurements and proved that the cleavages of C=O, N-H, and C-N bonds occurred during the biodegradation. Due to the degradation of FG, the surface of FG film became very rough after being buried in soil for 24 hours (the optical and SEM images shown in Supporting Information Figure S4), which explains the opaqueness of the film. To study the effects of moisture and sunlight on the FG films, the as-prepared FG films were exposed to air at 100% humidity (Figure S5a) or sunlight (Figure S5b).<sup>2</sup>

## Reference

1. Ben Slimane, E.; Sadok, S., Collagen from Cartilaginous Fish By-Products for a Potential Application in Bioactive Film Composite. *Mar. Drugs*. **2018**, 16, 1-19.
2. Etxabide, A.; Leceta, I.; Cabezudo, S.; Guerrero, P.; de la Caba, K., Sustainable Fish Gelatin Films: From Food Processing Waste to Compost. *ACS Sustain. Chem. Eng.* **2016**, 4, 4626-4634.
